# Supplementary material for: Growth-Suppressive and Apoptosis-Inducing Effects of Tetrandrine in SW872 Human Malignant Liposarcoma Cells via Activation of Caspase-9, Down-Regulation of XIAP and STAT-3, and ER Stress
Source: MDPI journal article supplement (doi:10.3390/biom12060843), 2022-06-17

**Table S1: List of antibodies used for Western blot analysis.**

| <b>Antibodies</b>                  | <b>Dilution used</b> | <b>Source</b>            | <b>Catalog no.</b> |
|------------------------------------|----------------------|--------------------------|--------------------|
| <i><b>Primary antibodies</b></i>   |                      |                          |                    |
| Procaspase-3                       | 1:2,000              | Enzo Life Sciences       | ADI-AAP-113        |
| Procaspase-9                       | 1:2,000              | Enzo Life Sciences       | ADI-AAP-139        |
| PARP                               | 1:2,000              | Cell signaling           | #9532              |
| DR-5                               | 1:2,000              | IMGENEX                  | IMG-120E           |
| Mcl-1                              | 1:2,000              | Santa Cruz Biotechnology | sc-819             |
| Bax                                | 1:2,000              | Santa Cruz Biotechnology | sc-493             |
| Bak                                | 1:2,000              | Santa Cruz Biotechnology | sc-1035            |
| XIAP                               | 1:2,000              | B&D systems              | AF8221             |
| HIAP-1                             | 1:2,000              | B&D systems              | AF8171             |
| p-eIF-2 $\alpha$ (S51)             | 1:2,000              | Abcam                    | ab32157            |
| T-eIF-2 $\alpha$                   | 1:2,000              | Cell signaling           | #9722              |
| GRP78                              | 1:2,000              | Santa Cruz Biotechnology | sc-13968           |
| ATF-4                              | 1:2,000              | Santa Cruz Biotechnology | sc-200             |
| p-STAT-3 (Y705)                    | 1:2,000              | Santa Cruz Biotechnology | sc-8059            |
| T-STAT-3                           | 1:2,000              | Santa Cruz Biotechnology | sc-8019            |
| <i><b>Secondary antibodies</b></i> |                      |                          |                    |
| Goat anti-rabbit IgG-<br>HRP       | 1:2000               | Santa Cruz Biotechnology | sc-2004            |
| Goat anti-mouse-IgG-<br>HRP        | 1:2000               | Santa Cruz Biotechnology | sc-2005            |
| Donkey anti-goat-IgG-<br>HRP       | 1:2000               | Santa Cruz Biotechnology | sc-2033            |

**Table S2: Sequences of primers used for RT-PCR.**

| Gene  | Forward                  | Reverse                       |
|-------|--------------------------|-------------------------------|
| XIAP  | CGTCGATTTTGTGATGCTCGTCAG | GAAGCATTTATCAGGGTTATTGTCTCATG |
| Actin | TCAAGATCATTGCTCCTCCTG    | CTGCTTGCTGATCCACATCTG         |

**Figure S1: Effects of tetrandrine on the survival and viability of 93T449 and HaCaT cells**

**Supplementary Figure S1**

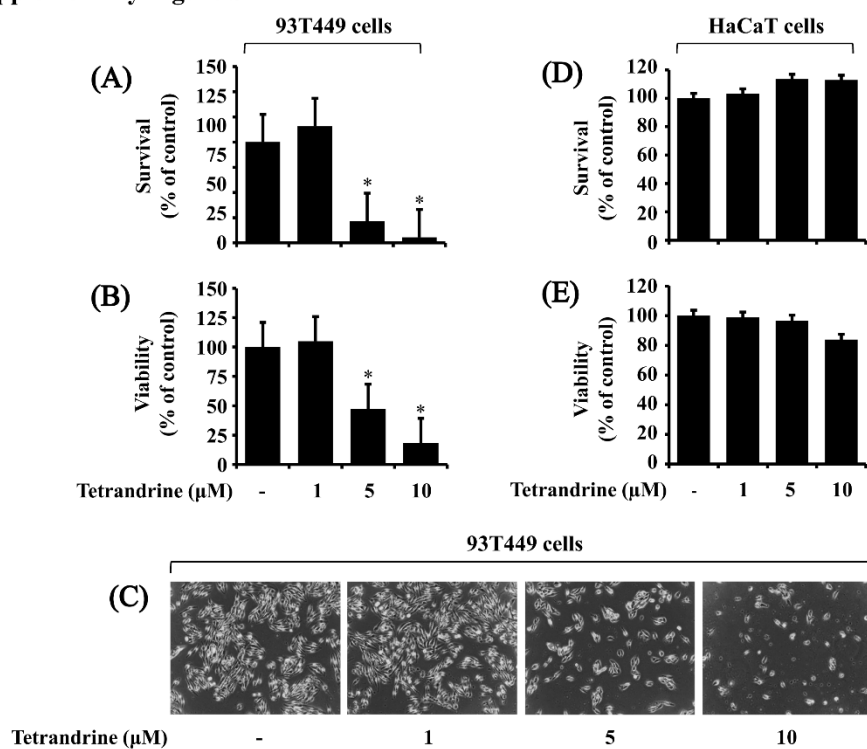

Supplement: s1 [file s1]
